# Supplementary material for: Phase selective synthesis of copper sulfides by non-hydrolytic sol–gel methods
Source: Royal Society of Chemistry journal article supplement (doi:10.1039/c3ra45053h), 2013-11-11
Supplement: c3ra45053h.pdf [file c3ra45053h.pdf]

## Supplementary Materials

Non-hydrolytic sol-gel reaction scheme:

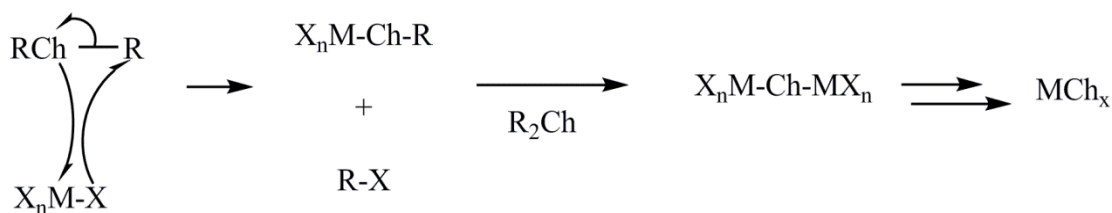

Reaction equations for reactions of copper chloride (not that continued reaction results in formation of metal sulfides):

- (i)  $\text{CuCl} + (\text{CH}_3)_3\text{Si-S-Si-(CH}_3)_3 \rightarrow \text{Cu-S-Si(CH}_3)_3 + (\text{CH}_3)_3\text{SiCl}$   
 $\text{Cu-S-Si(CH}_3)_3 + \text{CuCl} \rightarrow \text{Cu-S-Cu} + (\text{CH}_3)_3\text{SiCl}$   
 overall:  $x \text{CuCl} + x/2 (\text{CH}_3)_3\text{Si-S-Si-(CH}_3)_3 \rightarrow (\text{Cu}_2\text{S})_x + x (\text{CH}_3)_3\text{SiCl}$
- (ii)  $\text{CuCl}_2 + (\text{CH}_3)_3\text{Si-S-Si-(CH}_3)_3 \rightarrow \text{Cl-Cu-S-Si(CH}_3)_3 + (\text{CH}_3)_3\text{SiCl}$   
 $\text{Cl-Cu-S-Si(CH}_3)_3 + \text{CuCl}_2 \rightarrow \text{Cl-Cu-S-Cu-Cl} + (\text{CH}_3)_3\text{SiCl}$   
 $x (\text{Cl-Cu-S-Cu-Cl}) + x (\text{CH}_3)_3\text{Si-S-Si-(CH}_3)_3 \rightarrow (\text{CuS})_x + x (\text{CH}_3)_3\text{SiCl}$   
 overall:  $x \text{CuCl}_2 + x (\text{CH}_3)_3\text{Si-S-Si-(CH}_3)_3 \rightarrow (\text{CuS})_x + 2x (\text{CH}_3)_3\text{SiCl}$

Table S1: Elemental analysis of selected subset of samples from different synthetic routes shown in Figure 1. Cu/S ratios are calculated from EDS data except † (CHNS data).

|                    | Synthetic Variables | EDS    |       |        | CHNS    |          | Cu/S ratio |
|--------------------|---------------------|--------|-------|--------|---------|----------|------------|
|                    |                     | Cu at% | S at% | Cl at% | C wt%   | S wt%    |            |
| Route (1):         | RT                  | 64±6   | 35±4  | 1±1    | 0.7±0.3 | 19.4±0.6 | 1.8±0.3    |
| Neat               | 70 °C               | 70±5   | 29±5  | 0±1    | 0.4±0.3 | 19.8±0.6 | 2.0±0.1†   |
| Route (2):         | 5 min               | 68±4   | 30±4  | 2±1    |         |          | 2.2±0.4    |
| RT,                | 5 h                 | 67±5   | 32±5  | 1±1    |         |          | 2.1±0.4    |
| CH <sub>3</sub> CN | 7 d                 | 67±3   | 31±3  | 2±1    | 0.7±1.1 | 19.0±1.8 | 2.1±0.3    |
| Route (5):         | 0.2 M, 7 d          | 68±3   | 31±3  | 1±1    | 0.1±0.6 | 18.8±0.9 | 2.2±0.3    |
| RT,                | 0.4 M, 7 d          | 67±4   | 31±3  | 3±2    | 0.8±0.7 | 18.9±1.1 | 2.1±0.3    |
| CHCl <sub>3</sub>  | 0.9 M, 7 d          |        |       |        | 0.7±0.5 | 18.2±0.8 | 2.2±0.1†   |

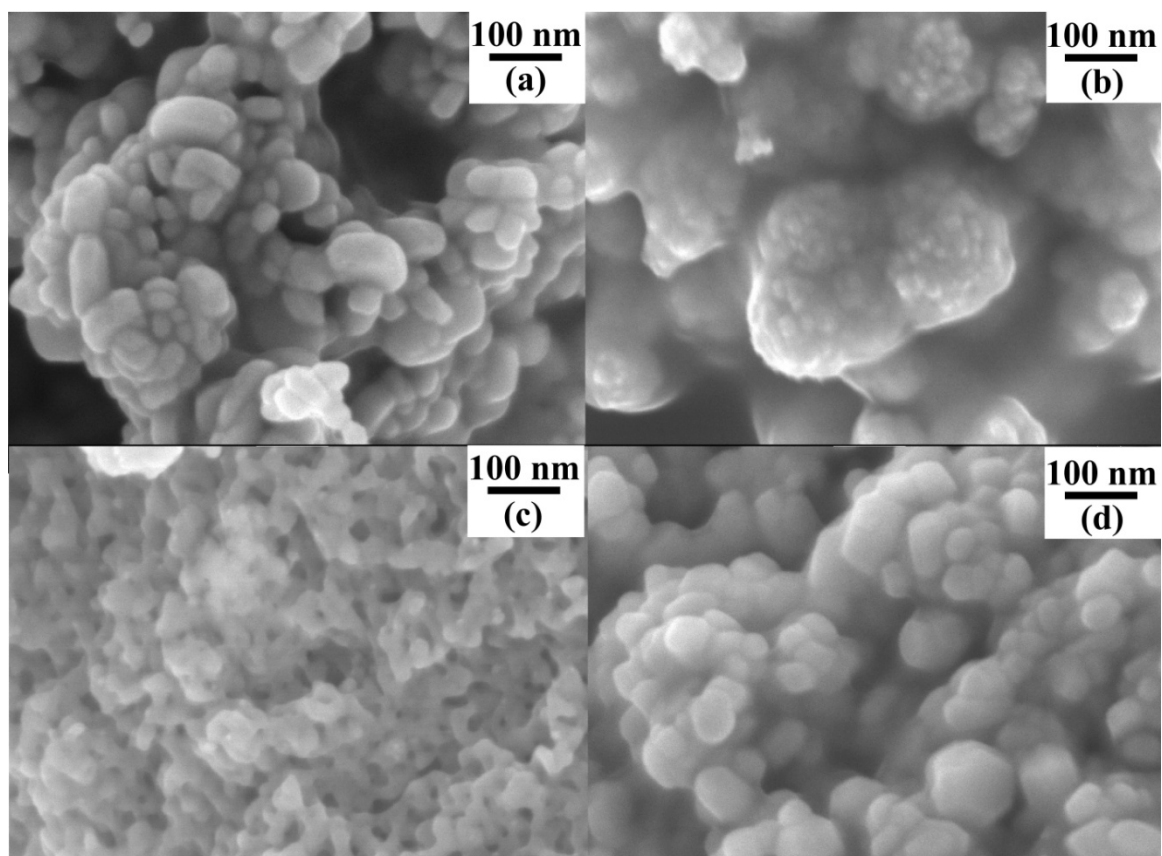

**Figure S1.** SEM images of copper sulfides prepared by reactions of CuCl with HMDST in chloroform at RT: a) 0.2 M HMDST, 1.5 h, b) 0.4 M HMDST, 1.5 h and in acetonitrile c) 0.2 M HMDST, 1 d and d) 0.2 M HMDST, 7d. a) and d) consist of  $\alpha$ -chalcocite, and b) and c) consist of  $\beta$ -chalcocite.

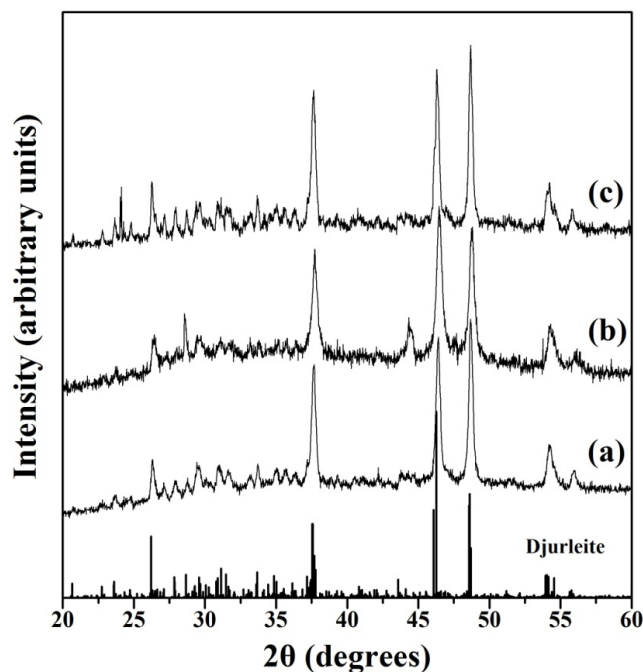

**Figure S2.** PXRD patterns of djurleite synthesized by reactions of CuCl and HMDST in acetonitrile for 7 d at: a) 70 °C with 0.4 M HMDST, b) 70 °C with 0.9 M HMDST and c) 130 °C with 0.9 M HMDST. Lines indicate peak positions of djurleite (PDF card 71-1383).

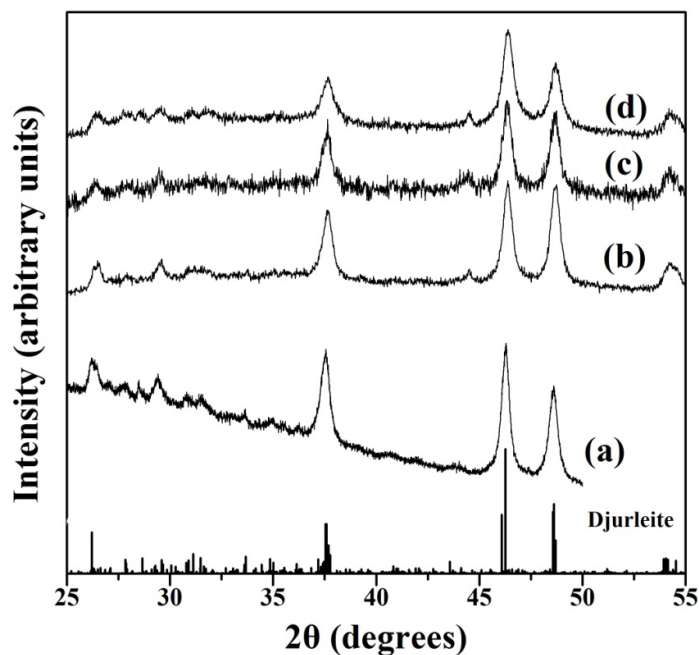

**Figure S3.** PXRD patterns of copper sulfides prepared by reactions of CuCl and HMDST in chloroform at 70 °C for 7 d with a) and b) 0.2 M HMDST, collected on capillary and flat stages, respectively, c) 0.4 M HMDST and d) 1.0 M HMDST. c) and d) were collected on a flat stage. The PDF card for djurleite is 71-1383.

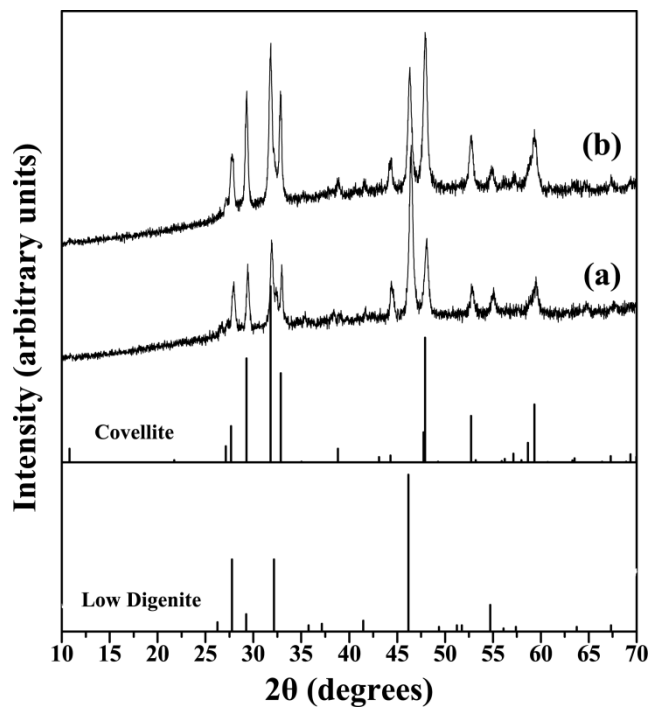

**Figure S4.** PXRd patterns of copper sulfides prepared by reactions of CuCl with 0.4 M HMDST in chloroform at 130 °C for a) 7 d and b) 15 d. Lines indicate PDF cards of low digenite (PDF card 47-1748, bottom) and covellite (PDF card 78-0877, top).

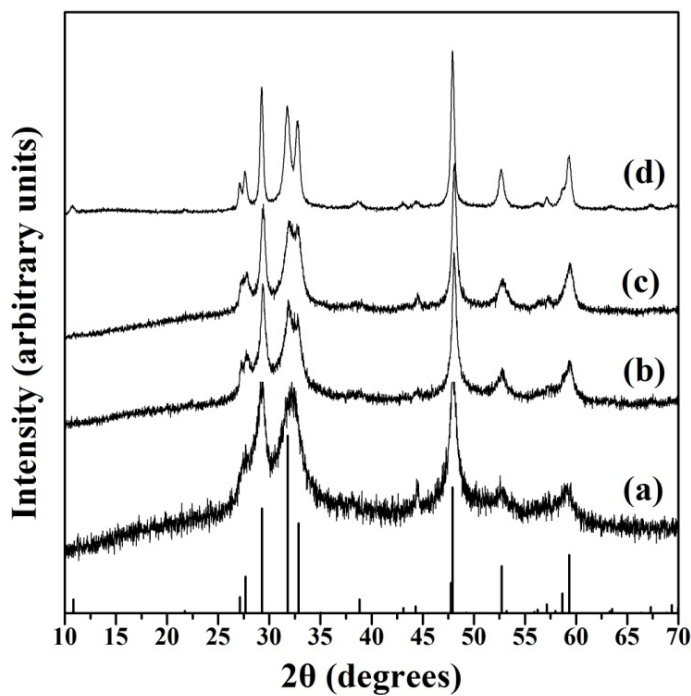

**Figure S5.** PXRd patterns of covellite prepared by reaction of CuCl<sub>2</sub> with 0.4 M HMDST a) in CHCl<sub>3</sub> at RT, and in CH<sub>3</sub>CN at b) RT, c) 70 °C and d) 130 °C. Lines indicate peak positions of covellite (PDF card 78-0877).

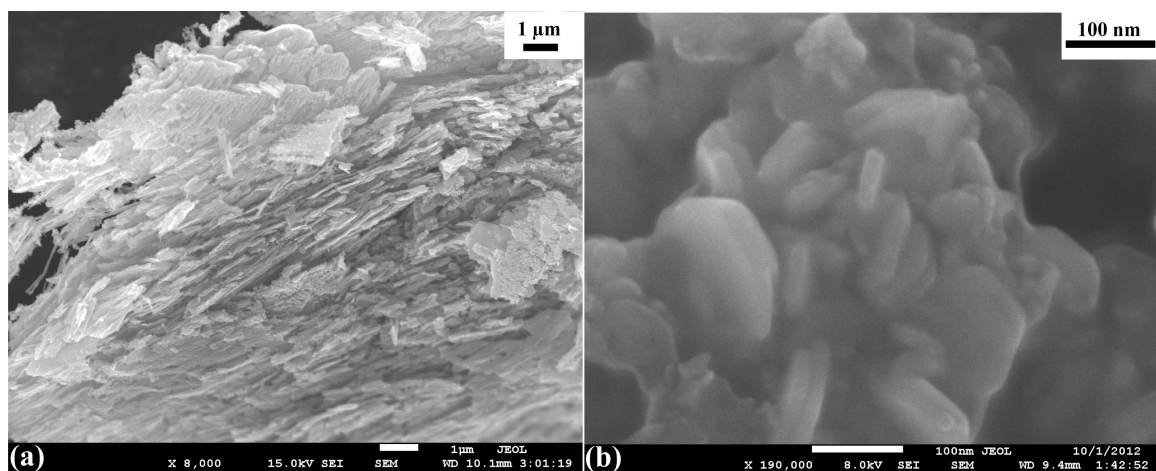

**Figure S6.** SEM images of covellite prepared by reactions of  $\text{CuCl}_2$  and HMDST with a) 0.9 M HMDST in chloroform at 70 °C for 7 d and b) 0.9 M HMDST in acetonitrile at RT for 4 d.

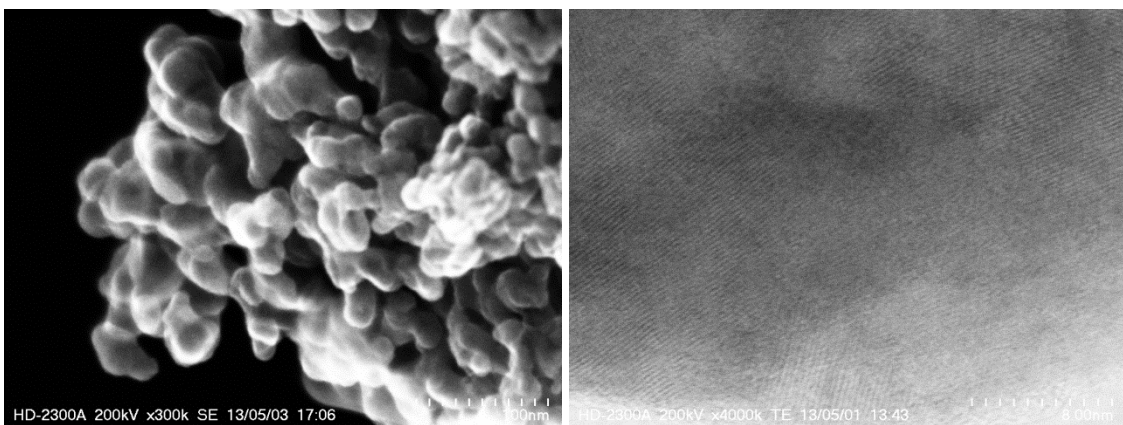

**Figure S7.** STEM images of samples prepared at RT with XRD patterns displaying phases between  $\alpha$ -chalcocite and djurleite. This is corroborated by the high magnification image, which shows multiple orientations of lattice fringes.

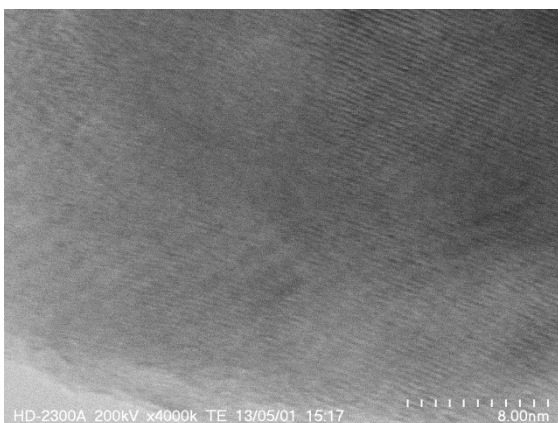

**Figure S8.** STEM image of a sample prepared with CuCl and HMDST in CH<sub>3</sub>CN at RT for 7 d. This sample consists of fully formed djurleite, and lattice fringes extend in the same direction over significant length scales.

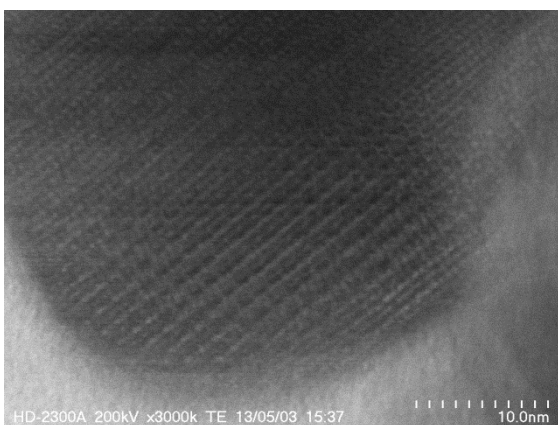

**Figure S9.** STEM image of a sample prepared with CuCl and high [HMDST] in CH<sub>3</sub>CN at RT for 5 h. The XRD pattern of this sample showed well crystallized phase pure  $\alpha$ -chalcocite at the time of recovery, and slow conversion to djurleite afterwards. This image was taken six months after preparation, when the sample consisted of a mixture of  $\alpha$ -chalcocite and djurleite.
